# Supplementary material for: Circulatory miRNAs as Correlates of Elevated Intra-Pancreatic Fat Deposition in a Mixed Ethnic Female Cohort: The TOFI_Asia Study
Source: MDPI journal article supplement (doi:10.3390/ijms241814393), 2023-09-21
Supplement: s1 [file s1]

| <b>miRNA Abundance</b> | <b>Lean (18-25 kg/m<sup>2</sup>)<br/>(n=18)</b> | <b>Overweight/Obese(&gt;25<br/>kg/m<sup>2</sup>) (n=50)</b> | <b>p-value</b> |
|------------------------|-------------------------------------------------|-------------------------------------------------------------|----------------|
| <b>miR-24-5p</b>       | 0.28 ± 0.52                                     | 0.32± 0.02                                                  | 0.48           |
| <b>miR-17-5p</b>       | 0.64 ± 0.04                                     | 0.60 ± 0.05                                                 | 0.72           |
| <b>miR-221-3p</b>      | 0.51 ± 0.03                                     | 0.55± 0.04                                                  | 0.46           |
| <b>miR-15a-5p</b>      | 0.45 ± 0.02                                     | 0.37 ± 0.04                                                 | 0.30           |
| <b>miR-361-5p</b>      | 0.05± 1.08                                      | 0.05 ± 0.004                                                | 0.44           |
| <b>miR-21-3p</b>       | 0.008±0.001                                     | 0.008±0.001                                                 | 0.87           |
| <b>miR-7-5p</b>        | 0.001 ± 0.000                                   | 0.001 ± 0.0002                                              | 0.69           |
| <b>miR-320a-3p</b>     | 1.96 ± 0.23                                     | 2.07 ±0.17                                                  | 0.92           |
| <b>miR-146-5p</b>      | 0.05 ± 0.01                                     | 0.05 ± 0.00                                                 | 0.92           |
| <b>miR-126-3p</b>      | 1.23± 0.14                                      | 1.03 ± 0.09                                                 | 0.37           |
| <b>miR-375-5p</b>      | 0.06 ± 0.18                                     | 0.06 ± 0.05                                                 | 0.90           |

***Supplementary Table S1: Quantitative analysis of the Eleven miRNAs***

The abundance of miRNAs between groups categorized based on BMI (Lean Vs Overweight/Obese)  
Data are expressed as Mean ± SEM. miR; microRNA.
